# Supplementary material
Source: publisher site journal article supplement (https://www.dovepress.com/article/270090)
Supplement: Supplementary file 1 [file get_supplementary_file.php]

Supplementary Figure 1 1H NMR spectra of AE-848.
